# Supplementary material
Source: PubMed Central journal article supplement (PMC3501592)

## **Supplemental Data**

### *Contribution of hepatic oxidative and nitrosative stress to APAP hepatotoxicity*

We next verified whether hepatic oxidative and nitrosative stress in WT and  $\text{J}\alpha 18^{-/-}$  mice were differentially stimulated by APAP intoxication. Malondialdehyde (MDA) protein-adducts are advanced lipid peroxidation end-products that were significantly higher in WT mice in comparison to  $\text{J}\alpha 18^{-/-}$  mice during APAP hepatotoxicity and vehicle-treated WT mice (Fig. A). Specifically, APAP intoxication of WT mice increased MDA protein band intensity at 60kDa, 75kDa, 82kDa, 100kDa, 150kDa, and 260kDa relative to that observed in  $\text{J}\alpha 18^{-/-}$  mice (Fig. A). However, BSO treatment of  $\text{J}\alpha 18^{-/-}$  mice increased MDA-adduct levels further by 2.4-fold as shown in Fig. A. Nitrosative stress was assessed by nitrotyrosine staining, which was high in all APAP treatments versus vehicle group, with strongly stained bands at 46kDa, 100kDa, and 200kDa (Fig. B). Intriguingly, bands from APAP-treated  $\text{J}\alpha 18^{-/-}$  mice at 46kDa and 100kDa had higher nitrotyrosine levels versus WT mice. Notably, BSO treatment of  $\text{J}\alpha 18^{-/-}$  mice enhanced nitrotyrosine levels (1.5-fold) in correlation with MDA-adduct levels.

To assess DNA-strand breaks, a TUNEL assay identified that the highest DNA fragmentation events were observed in WT mice treated with APAP (64.1% of cells were TUNEL-positive) as shown in Fig. C. These DNA-strand breaks were lower in  $\text{J}\alpha 18^{-/-}$  mice with APAP (37.9%) and APAP+BSO treatment (30.7%) followed by vehicle-treated mice (1%) shown in Fig. C.

## **Figure Legend**

Effect of GSH depletion on oxidative/nitrosative stress markers and DNA fragmentation during APAP liver toxicity. Western blot analysis of MDA (A) and Nitrotyrosine (B) stained hepatic proteins from WT and  $\text{J}\alpha 18^{-/-}$  mice during APAP hepatotoxicity. Data in A and B are shown as mean  $\pm$  SEM with n=2-4 mice/group. (C) TUNEL assay liver sections analysis with cellular DNA stained with DAPI (blue) whereas TUNEL positive cells express fluorescein (green).

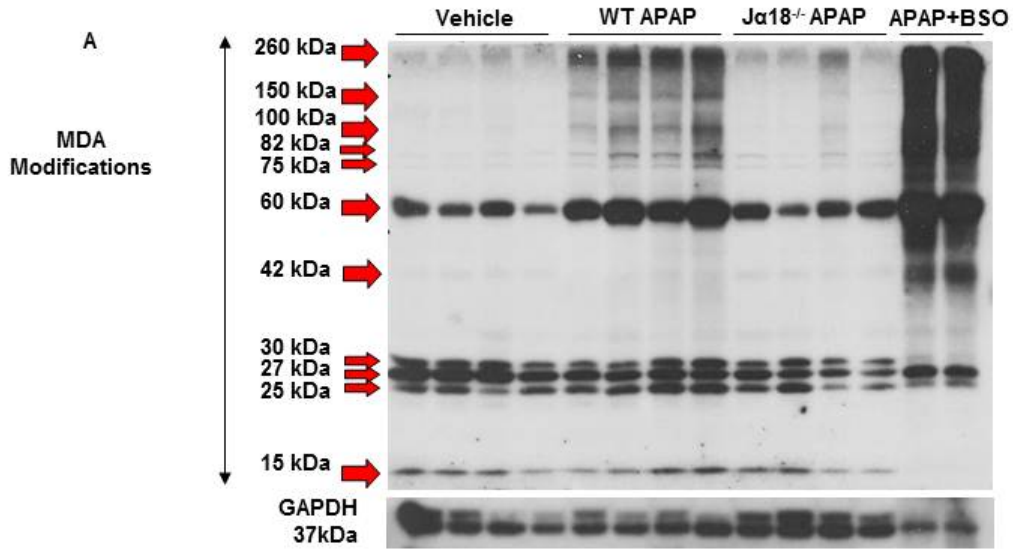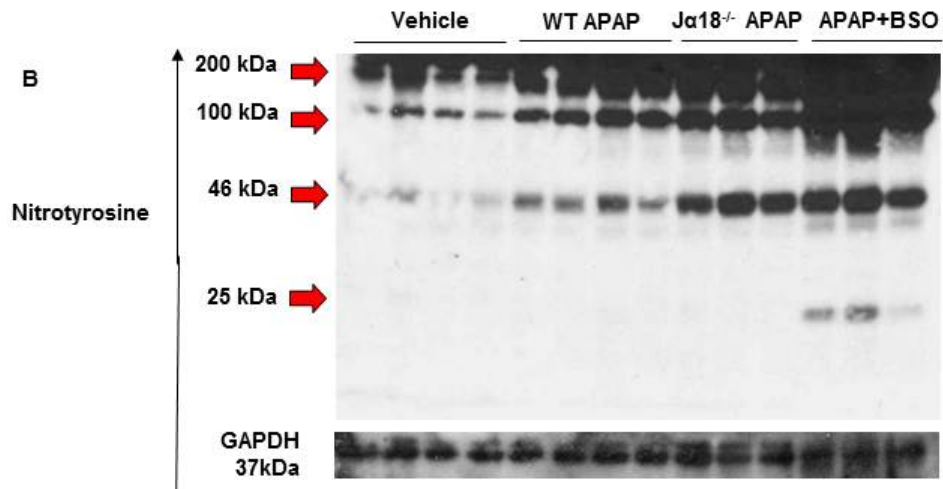

C

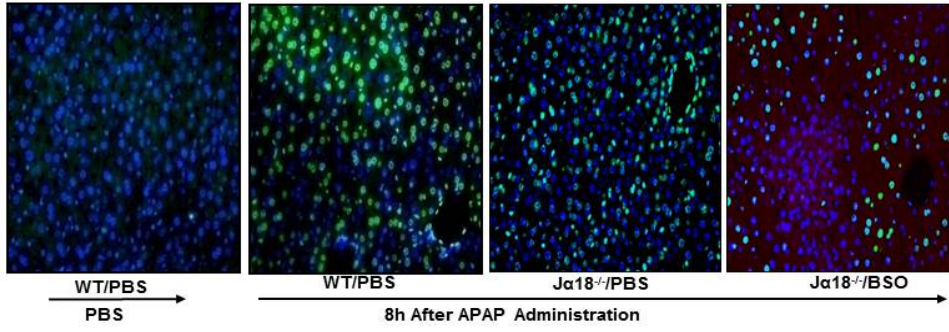

Supplement: NIHMS415185-supplement-01.pdf [file NIHMS415185-supplement-01.pdf]
